# Supplementary material for: Ex Vivo Nicotine Stimulation Augments the Efficacy of Human Peripheral Blood Mononuclear Cell-Derived Dendritic Cell Vaccination via Activating Akt-S6 Pathway
Source: Anal Cell Pathol (Amst). 2015 Aug 13;2015:741487. doi: 10.1155/2015/741487 (PMC4550800; doi:10.1155/2015/741487)
Supplement: Supplementary file 1 — Figure S1: The treatment with lower dose nicotine has no effect on cell viability of human semi-mature DCs. Figure S2: Nicotine up-regulates CD11c and CD1a expression in human semi-mature DCs. Figure S3: The treatment with nicotine promotes human DCs maturation in human semi-mature DCs. Figure S4: The treatment with nicotine induces Erk-p38 activation in human semi-mature DCs. [file 741487.f1.zip]

Archive with 5 entries (4 files):
- 741487.f1/
- 741487.f1/Figure S1.ppt
- 741487.f1/Figure S2.ppt
- 741487.f1/Figure S3.ppt
- 741487.f1/Figure S4.ppt
